# Supplementary material for: Association of Long-term Strenuous Physical Activity and Extensive Sitting With Incident Radiographic Knee Osteoarthritis
Source: PubMed Central journal article supplement (PMC7199114; doi:10.1001/jamanetworkopen.2020.4049), 2020-05-04
Supplement: jamanetwopen-3-e204049-s001.pdf [file jamanetwopen-3-e204049-s001.pdf]

## Supplementary Online Content

Chang AH, Lee J, Chmiel JS, Almagor O, Song J, Sharma L. Association of long-term strenuous physical activity and extensive sitting with incident radiographic knee osteoarthritis. *JAMA Netw Open*. 2020;3(5):e204049.  
doi:10.1001/jamanetworkopen.2020.4049

**eTable.** Eligibility and Exclusion Criteria for Participants at High Risk for Knee Osteoarthritis

**eFigure 1.** Derivation of Analysis Sample (n = 1194)

**eFigure 2.** Associations of Extensive Sitting Trajectories With 10-Year Incident Radiographic Knee Osteoarthritis

This supplementary material has been provided by the authors to give readers additional information about their work.

**eTable.** Eligibility and Exclusion Criteria for Participants at High Risk for Knee Osteoarthritis

| <b>Criteria</b>                           | <b>Description</b>                                                                                                                             |
|-------------------------------------------|------------------------------------------------------------------------------------------------------------------------------------------------|
| Age and sex distribution                  | Proportional to the US population                                                                                                              |
| Racial/ethnic minority representation     | Per representation in respective area                                                                                                          |
| Enrollment site                           | Baltimore, Maryland; Columbus, Ohio; Pittsburgh, Pennsylvania; or Pawtucket, Rhode Island                                                      |
| Eligibility                               | One or more of the following, in the absence of radiographic knee osteoarthritis:                                                              |
|                                           | Frequent knee symptoms (most days of 1 mo in the past 12 mo)                                                                                   |
|                                           | Excess body weight (body weight above the median for each age- and sex-specific group, based on data from the Framingham Osteoarthritis Study) |
|                                           | Prior knee injury causing walking difficulty for at least 1 wk                                                                                 |
|                                           | Previous knee surgery                                                                                                                          |
|                                           | Family history of knee replacement                                                                                                             |
|                                           | Heberden nodes                                                                                                                                 |
|                                           | Repetitive knee bending                                                                                                                        |
|                                           | Aged 70-79 y                                                                                                                                   |
| Exclusion                                 | Inflammatory arthritis                                                                                                                         |
|                                           | Severe bilateral joint space narrowing                                                                                                         |
|                                           | Knee replacement and severe contralateral narrowing                                                                                            |
|                                           | Bilateral knee replacement or plan for it within 3 y                                                                                           |
|                                           | Magnetic resonance imaging contraindications                                                                                                   |
|                                           | Use of aids for >50% of ambulation (except 1 cane)                                                                                             |
|                                           | Severe comorbidity                                                                                                                             |
| Double-blind clinical trial participation |                                                                                                                                                |
| Recruitment                               | Community-dwelling individuals recruited through population lists, mass mailing of study materials, and media and community outreach           |

**eFigure 1.** Derivation of Analysis Sample (n = 1194)

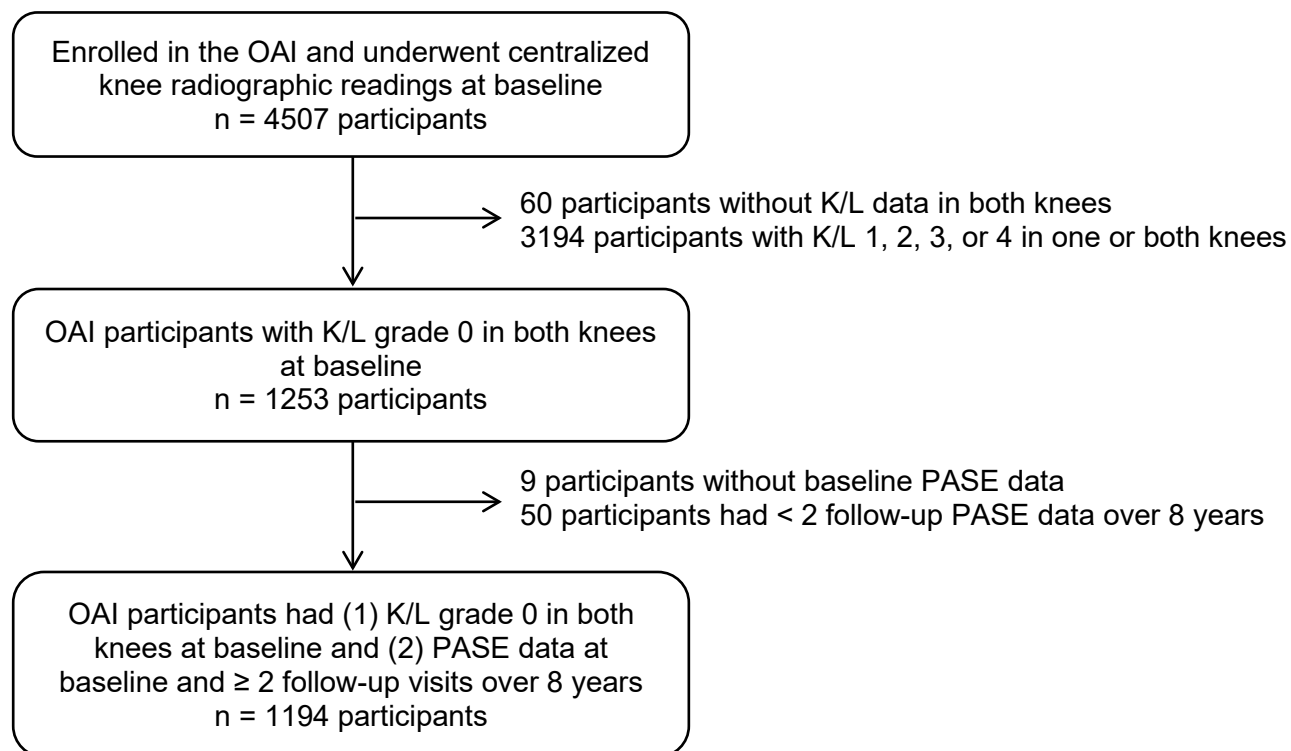

OAI: Osteoarthritis Initiative; K/L: Kellgren/Lawrence; PASE: Physical Activity Scale for the Elderly

**eFigure 2.** Associations of Extensive Sitting Trajectories With 10-Year Incident Radiographic Knee Osteoarthritis

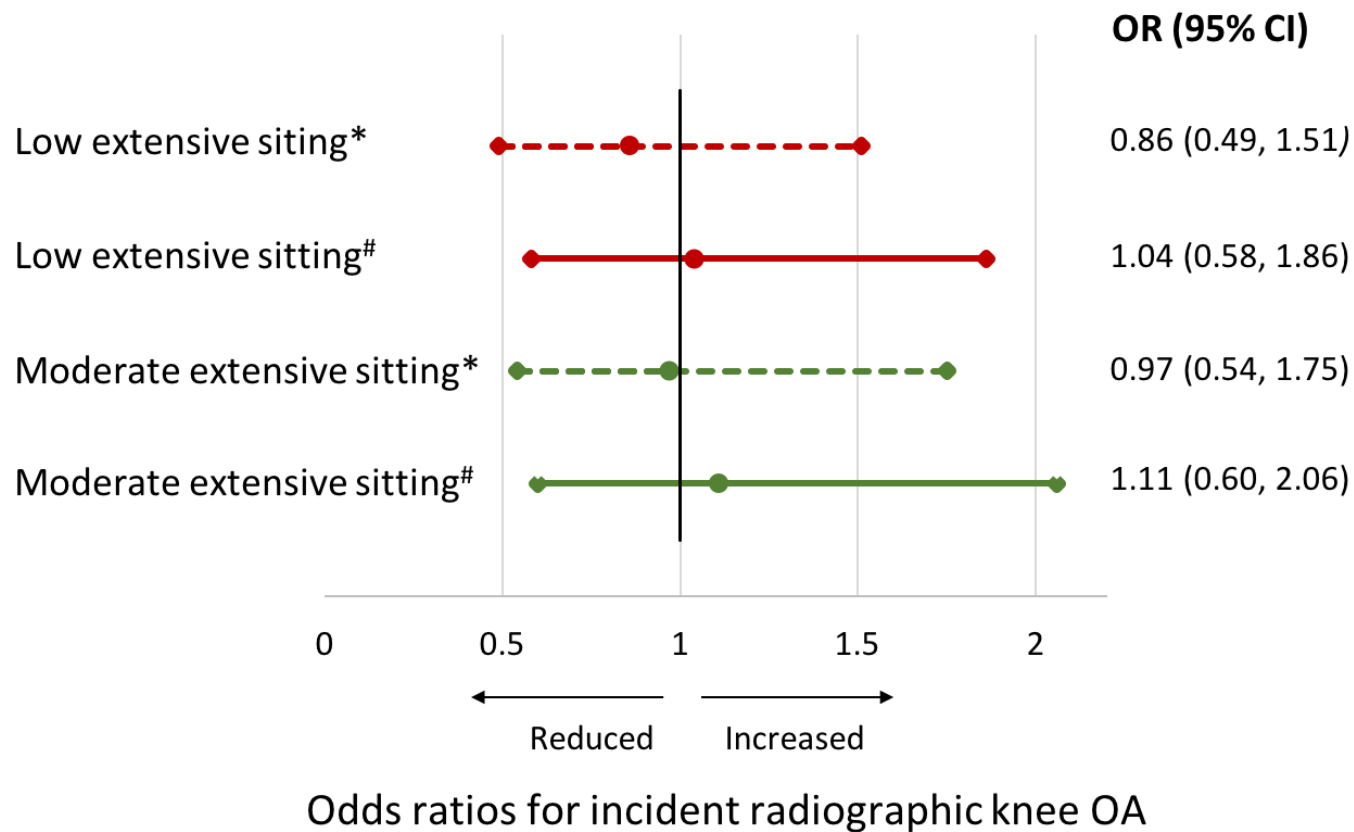

Red marks and lines represent low extensive sitting trajectory subgroup over 8 years. Green marks and lines represent moderate extensive sitting trajectory subgroup. Reference group: high extensive sitting trajectory subgroup. Odds ratios (ORs) and 95% confidence intervals (CIs) are plotted; a 95% CI that is completely below the value of 1 supports a statistically significant reduced likelihood of incident knee osteoarthritis.

\*unadjusted (dashed lines); #adjusted for age, sex, and BMI (solid lines)
